# Supplementary material for: A Human Stem Cell Model of Fabry Disease Implicates LIMP-2 Accumulation in Cardiomyocyte Pathology
Source: PubMed Central journal article supplement (PMC6700557; doi:10.1016/j.stemcr.2019.07.004), 2019-08-01
Supplement: mmc1.pdf [file mmc1.pdf]

**Stem Cell Reports, Volume 13**

**Supplemental Information**

**A Human Stem Cell Model of Fabry Disease Implicates LIMP-2 Accumulation in Cardiomyocyte Pathology**

**Matthew J. Birket, Sophie Raibaud, Miriam Lettieri, Antony D. Adamson, Valerie Letang, Pauline Cervello, Nicolas Redon, Gwenaelle Ret, Sandra Viale, Bing Wang, Bruno Biton, Jean-Claude Guillemot, Vincent Mikol, John P. Leonard, Neil A. Hanley, Cecile Orsini, and Jean-Michel Itier**

Figure S1

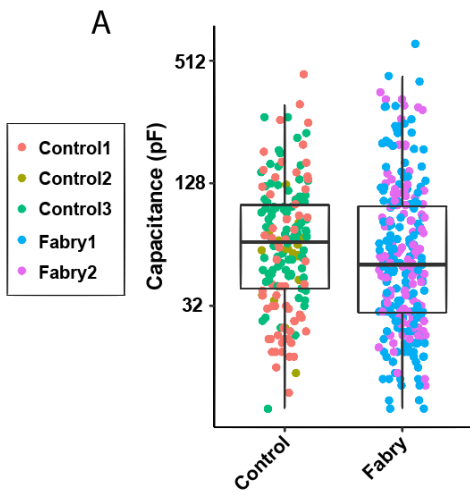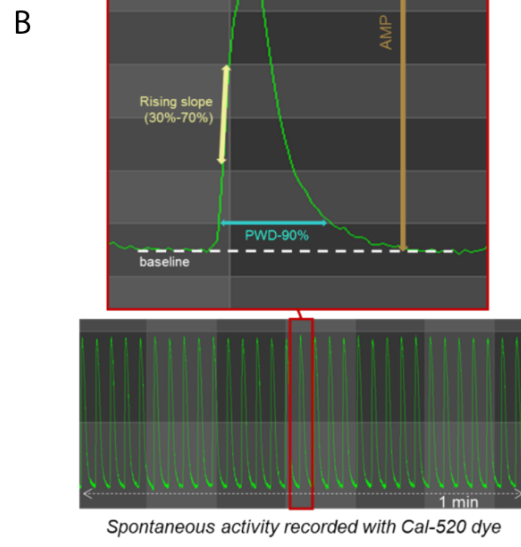

Figure S2

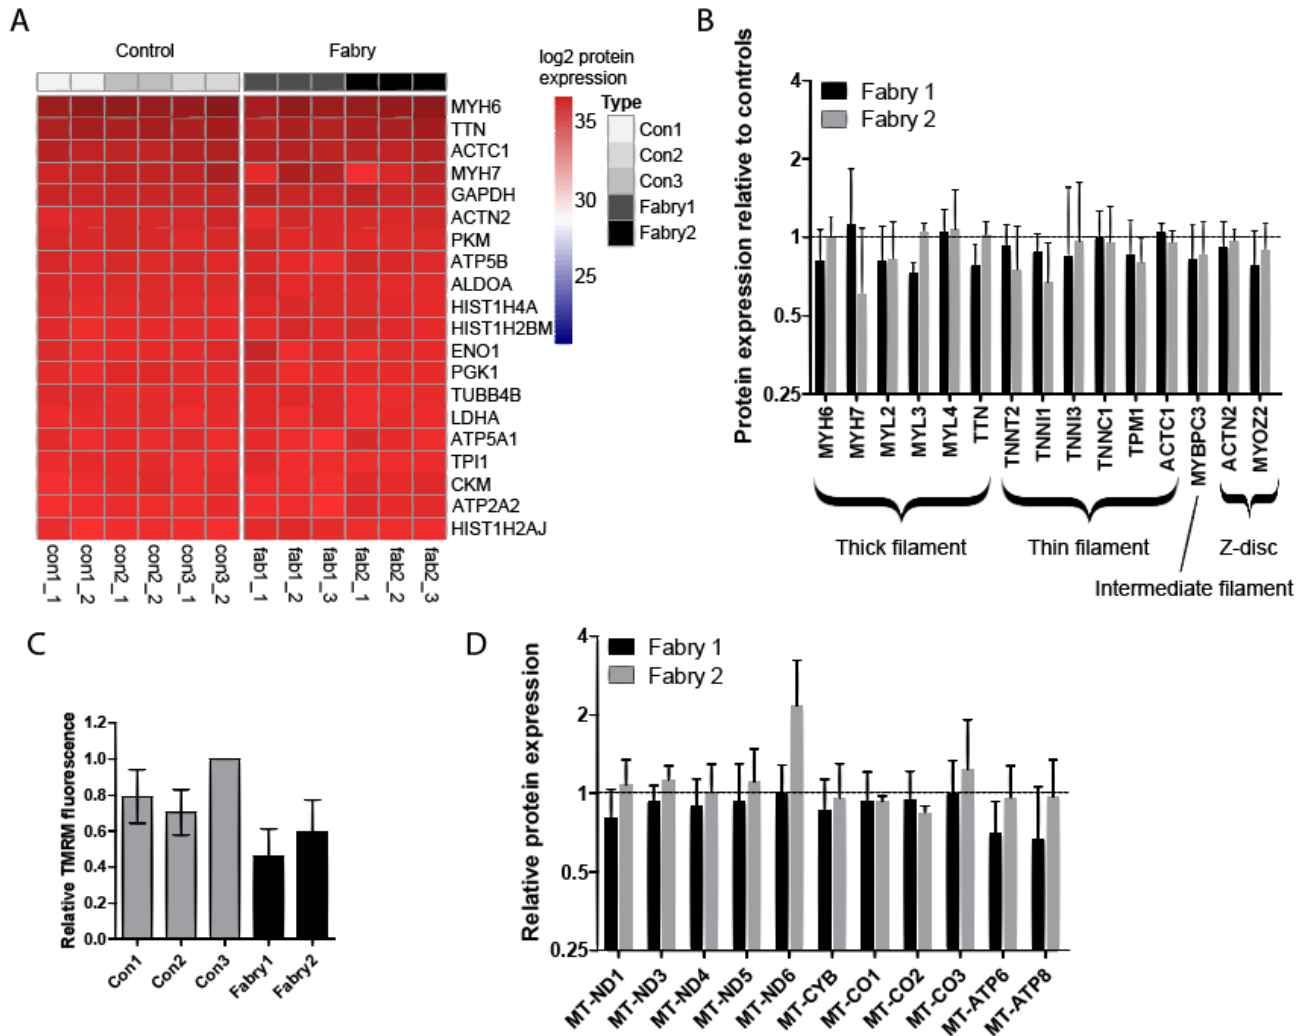

Figure S3

A

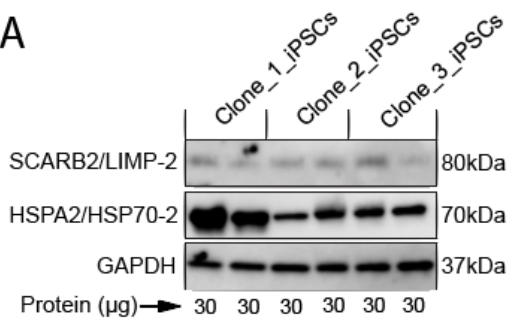

B

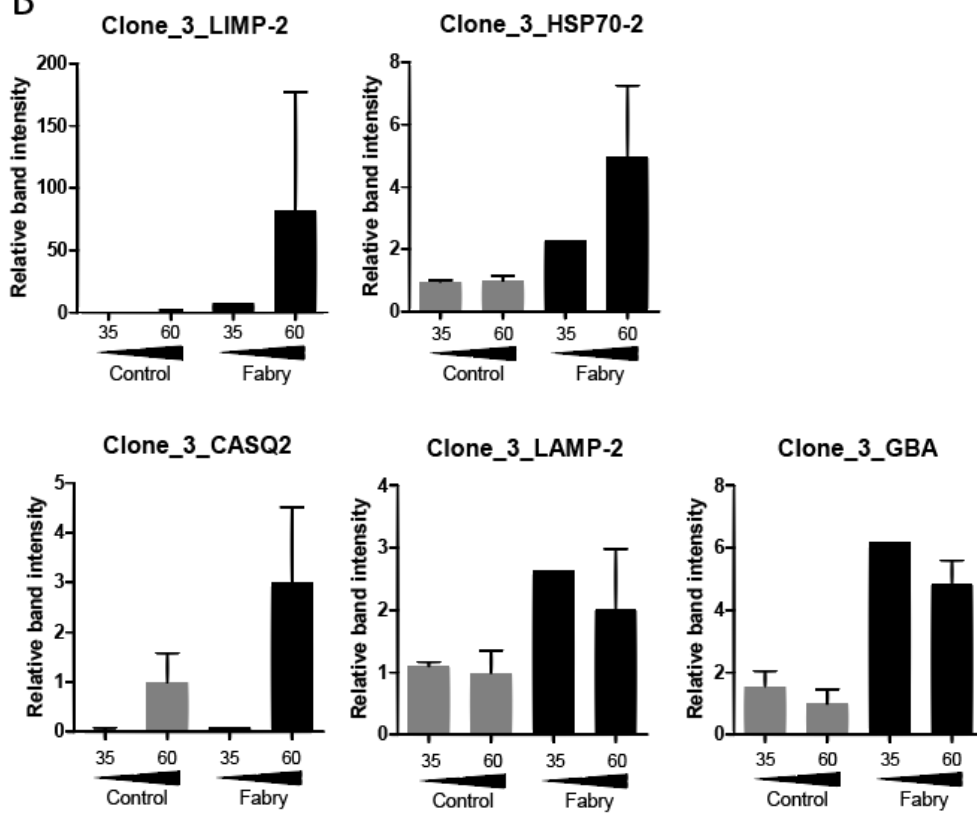

Figure S4

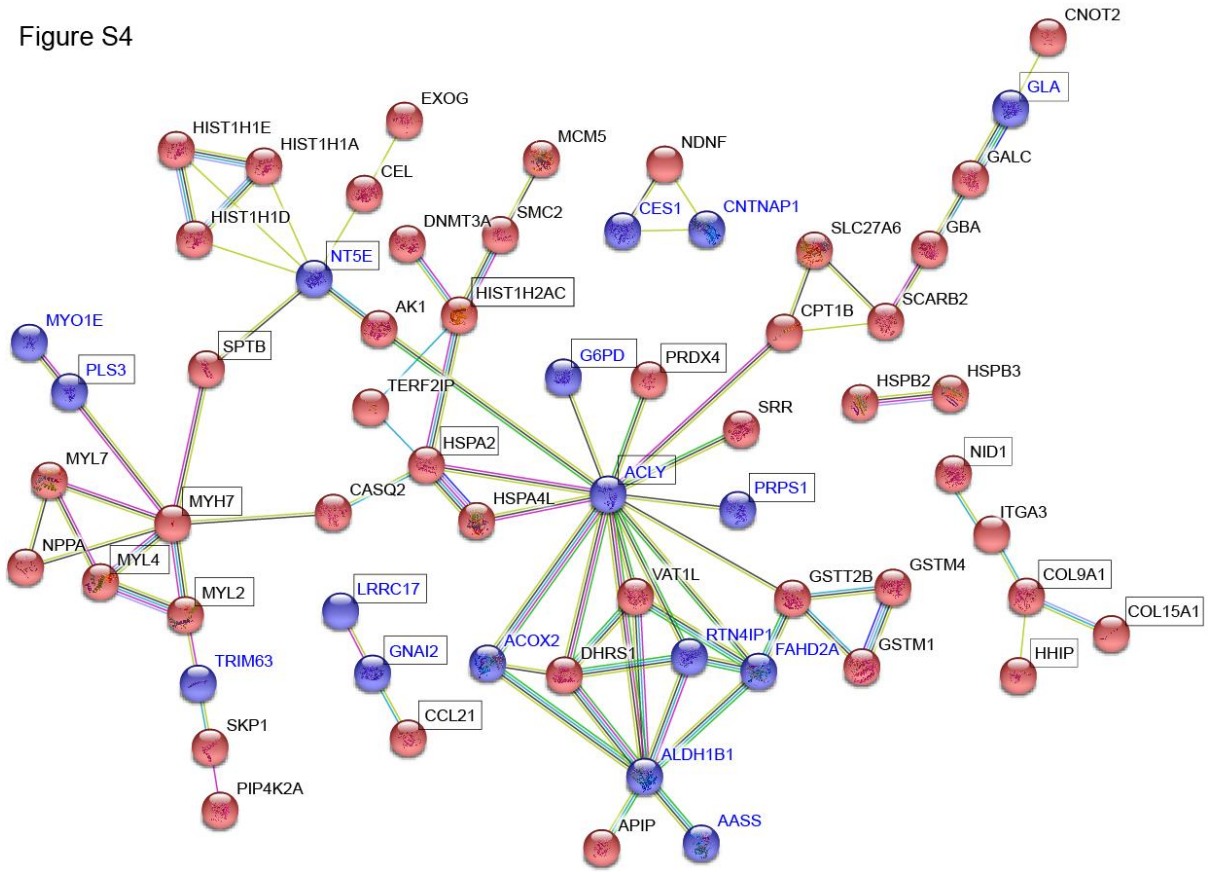

Figure S5

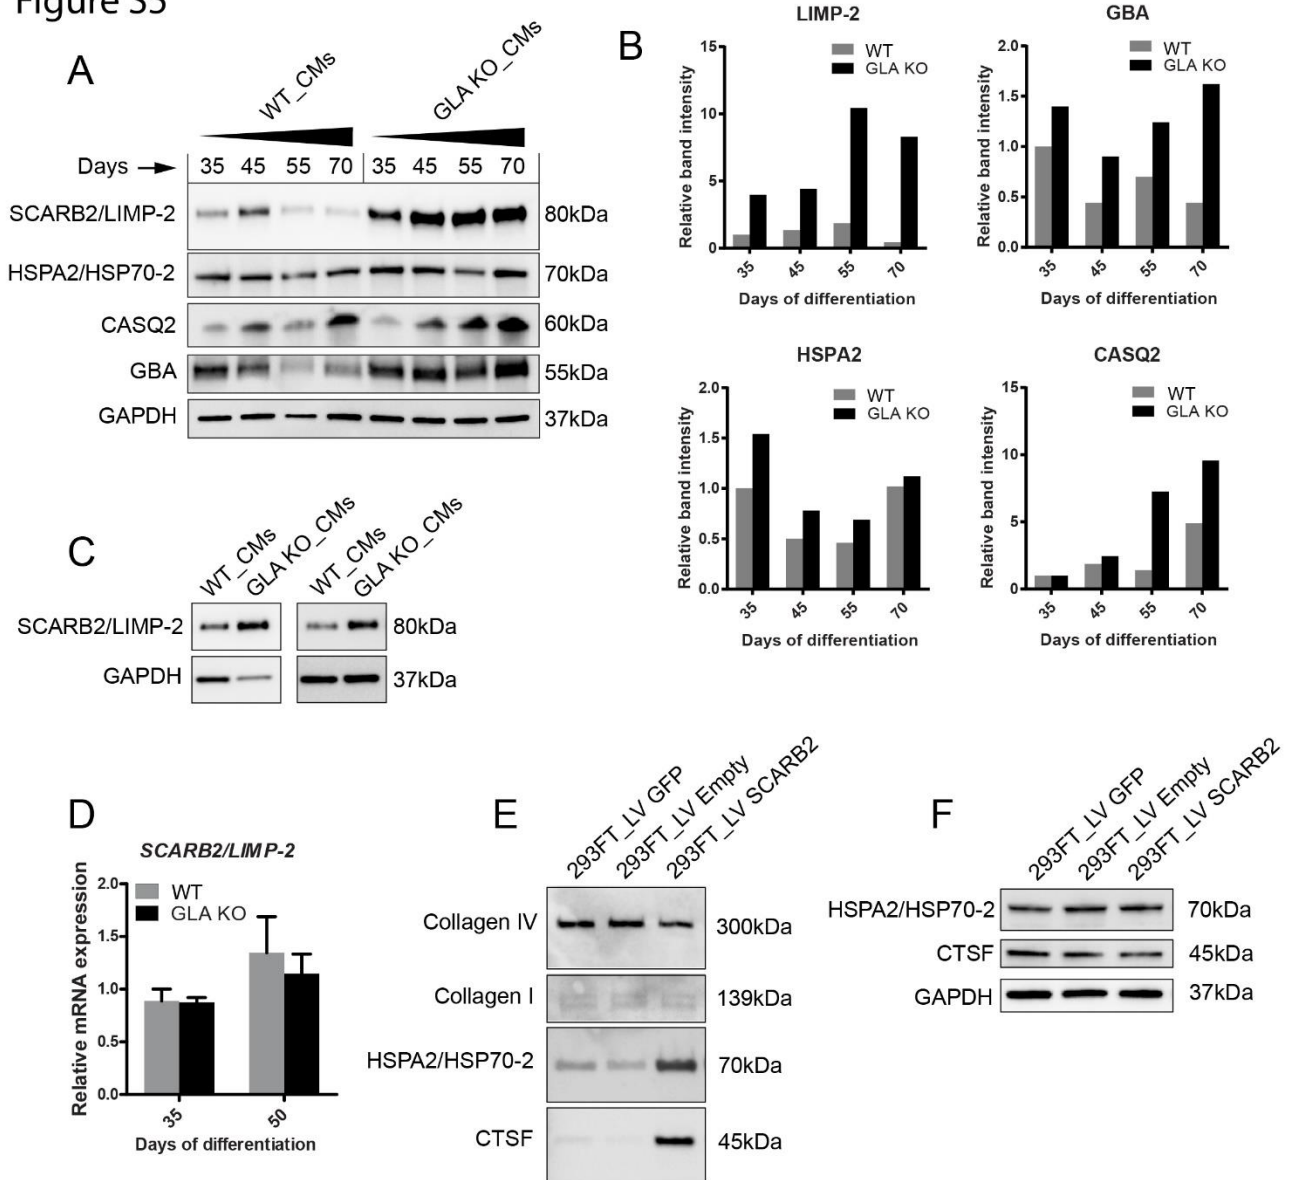

**Figure S1. Cardiomyocyte capacitance and calcium transient measurements.** A) Capacitance measurements of single cardiomyocytes from 3 control and 2 Fabry iPSC lines. Boxes indicate the median  $\pm$  quartiles and whiskers show the range minus outliers. B) Example Cal-520 imaging measurements and quantification of calcium transient parameters. PWD-90% = peak width at 90% of recovery, and AMP = amplitude ( $\Delta F/F$ ).

**Figure S2. Extended proteome and functional analysis.** A) Heatmap of the top 20 most highly expressed proteins by average abundance. B) Relative levels of sarcomeric proteins in Fabry-CMs compared to controls. The sarcomeric location of each protein is highlighted below. C) Normalized TMRM fluorescence after probe equilibration. D) Relative levels of mtDNA-encoded proteins in Fabry-CMs compared to controls. Bars show mean  $\pm$  s.d. for 5 independent biological replicates for each cell line.

**Figure S3. Extended Western blots and analyses.** A) Western blots of three different iPSC clones derived from Fabry1 patient cells. Clone 1 is used throughout the rest of the study. B) Quantification of Western blots in **Figure 4E** as control and Fabry ordered by differentiation time, calculated as relative band density normalized to GAPDH levels. Each lysate was produced from an independent experiment. Bars show mean  $\pm$  s.d.

**Figure S4. Results of STRING analysis,** showing potential protein-protein-interactions, as run on the 113 differentially expressed cellular and secreted proteins from **Table S3** and **Table S4**. Up- and Down-regulated proteins in Fabry-CMs are shown in red and blue respectively. Proteins differentially expressed in the secretome are highlighted in squares.

**Figure S5. Extended Western blots from GLA KO hPSC-CMs and LIMP-2 overexpressing cells.** A) Western blots of MAN13 control (WT\_CMs) and paired *GLA* knockout (GLA KO\_CMs) hESC-derived CMs taken at four timepoints from a single differentiation. B) Quantification of Western blots in 'A'. C) Western blots of con3 (WT\_CMs) and paired *GLA* knockout iPSC-derived CMs (day 35) from two separate experiments. D) *SCARB2* mRNA expression in MAN13 control and paired *GLA* knockout hESC-derived CMs, taken at two timepoints through a single differentiation. E) Western blot of secretome samples from two independent experiments/transductions showing the impact of LIMP-2 overexpression on protein secretion by 293FT cells. F) Western blot of 293FT cells showing no impact of LIMP-2 overexpression on cellular marker expression.

**Table S1.**

|                                  | <b>Controls<br/>(n=136)</b> | <b>Fabry<br/>(n=213)</b> |
|----------------------------------|-----------------------------|--------------------------|
| <b>MDP (mV)</b>                  | -63.6±1.2                   | -69.1±0.8*               |
| <b>dV/dt<sub>max</sub> (V/s)</b> | 41.6±4.5                    | 64.6±4.1*                |
| <b>APA (mV)</b>                  | 89.9±2.1                    | 88.9±1.3                 |
| <b>APD<sub>90</sub> (ms)</b>     | 476±35                      | 276±19*                  |
| <b>Frequency (Hz)</b>            | 1.2±0.1                     | 1.6±0.1*                 |
| <b>Capacitance (Cm)</b>          | 80.3±4.8                    | 79.3±4.9                 |
| <b>I<sub>Na</sub> (pA/pF)</b>    | 60.3±3.5                    | 108.7±5.5*               |

**Table S2.**

|                                                                 | <b>Controls<br/>(n = 8)</b> | <b>Fabry<br/>(n = 8)</b> |
|-----------------------------------------------------------------|-----------------------------|--------------------------|
| <b>Frequency (Hz)</b>                                           | 0.8±0.1                     | 0.9±0.2                  |
| <b>Peak width duration 90%<br/>(ms)</b>                         | 830±8                       | 581±7                    |
| <b>Corrected peak width<br/>duration 90% (ms)</b>               | 777±4                       | 556±3                    |
| <b>Rising slope (30-70%)</b>                                    | 20±2                        | 57±2                     |
| <b>Baseline fluorescence (F)</b>                                | 995±7                       | 917±7                    |
| <b>Amplitude (<math>\Delta F/F</math>)</b>                      | 2.2±0.1                     | 3.2±0.4                  |
| <b>Caffeine-induced<br/>amplitude (<math>\Delta F/F</math>)</b> | 2.7±0.4                     | 3.9±0.4                  |



**Table S4.**

| Uniprot | Protein name                                             | Gene name | Log2 FC |        | AvExp | p.value  | adj.P.Val |
|---------|----------------------------------------------------------|-----------|---------|--------|-------|----------|-----------|
|         |                                                          |           | Fabry1  | Fabry2 |       |          |           |
| Q96GE9  | Transmembrane protein 261                                | TMEM261   | 4.17    | 4.10   | 21.11 | 1.18E-08 | 4.97E-05  |
| P09488  | Glutathione S-transferase Mu 1                           | GSTM1     | 3.84    | 4.05   | 21.24 | 9.44E-07 | 0.000991  |
| Q02539  | Histone H1.1                                             | HIST1H1A  | 3.97    | 2.67   | 22.36 | 8.16E-05 | 0.009957  |
| Q9HCJ6  | Synaptic vesicle membrane protein VAT-1 homolog-like     | VAT1L     | 2.73    | 2.91   | 23.57 | 3.65E-05 | 0.006139  |
| Q13601  | KRR1 small subunit processome component homolog          | KRR1      | 2.68    | 2.92   | 20.41 | 7.67E-06 | 0.002479  |
| P54652  | Heat shock-related 70 kDa protein 2                      | HSPA2     | 3.33    | 2.09   | 25.79 | 1.58E-06 | 0.001325  |
| Q9Y2C4  | Nuclease EXOG, mitochondrial                             | EXOG      | 2.32    | 3.09   | 21.59 | 0.000557 | 0.022275  |
| P0CG30  | Glutathione S-transferase theta-2B                       | GSTT2B    | 2.03    | 3.10   | 24.49 | 2.87E-06 | 0.001471  |
| Q5T6V5  | UPF0553 protein C9orf64                                  | C9orf64   | 2.77    | 2.17   | 22.45 | 0.000777 | 0.025588  |
| Q7L5Y1  | Mitochondrial enolase superfamily member 1               | ENOSF1    | 2.49    | 2.06   | 19.92 | 0.001314 | 0.033058  |
| Q8N1Q1  | Carbonic anhydrase 13                                    | CA13      | 2.07    | 1.86   | 22.39 | 1.79E-05 | 0.003694  |
| O75764  | Transcription elongation factor A protein 3              | TCEA3     | 1.46    | 2.04   | 21.14 | 5.55E-05 | 0.007746  |
| O95347  | Structural maintenance of chromosomes protein 2          | SMC2      | 1.58    | 1.93   | 20.44 | 1.90E-05 | 0.003694  |
| Q5TDH0  | Protein DDI1 homolog 2                                   | DDI2      | 1.65    | 1.71   | 23.28 | 0.000422 | 0.019693  |
| Q9H7C9  | Mth938 domain-containing protein                         | AAMDC     | 1.60    | 1.48   | 21.99 | 3.49E-07 | 0.000732  |
| O14958  | Calsequestrin-2                                          | CASQ2     | 1.14    | 1.91   | 27.71 | 0.002653 | 0.045901  |
| Q9NZN8  | CCR4-NOT transcription complex subunit 2                 | CNOT2     | 1.30    | 1.49   | 20.41 | 0.002426 | 0.044918  |
| Q14331  | Protein FRG1                                             | FRG1      | 1.55    | 1.14   | 20.32 | 0.00116  | 0.030633  |
| Q14108  | Lysosome membrane protein 2                              | SCARB2    | 1.48    | 1.21   | 27.31 | 4.90E-06 | 0.001915  |
| Q9NYB0  | Telomeric repeat-binding factor 2-interacting protein 1  | TERF2IP   | 1.25    | 1.43   | 20.24 | 0.002794 | 0.046567  |
| Q96LJ7  | Dehydrogenase/reductase SDR family member 1              | DHRS1     | 1.68    | 0.94   | 21.09 | 0.000228 | 0.014663  |
| Q92523  | Carnitine O-palmitoyltransferase 1, muscle isoform       | CPT1B     | 1.27    | 1.12   | 25.82 | 1.70E-05 | 0.003694  |
| Q9UBX1  | Cathepsin F                                              | CTSF      | 0.77    | 1.61   | 20.80 | 0.001077 | 0.029489  |
| Q9Y6M5  | Zinc transporter 1                                       | SLC30A1   | 1.09    | 1.23   | 21.43 | 0.002451 | 0.044918  |
| P16402  | Histone H1.3                                             | HIST1H1D  | 1.49    | 0.75   | 23.62 | 0.000982 | 0.028905  |
| O95757  | Heat shock 70 kDa protein 4L                             | HSPA4L    | 1.53    | 0.57   | 23.73 | 0.000372 | 0.018275  |
| P33992  | DNA replication licensing factor MCM5                    | MCM5      | 1.40    | 0.61   | 25.43 | 0.002254 | 0.043628  |
| P05114  | Non-histone chromosomal protein HMG-14                   | HMGN1     | 1.24    | 0.71   | 19.43 | 0.000352 | 0.017998  |
| P46937  | Transcriptional coactivator YAP1                         | YAP1      | 0.87    | 1.06   | 22.17 | 0.000112 | 0.010898  |
| Q53HC9  | Protein TSSC1                                            | TSSC1     | 1.05    | 0.88   | 21.42 | 0.002837 | 0.046689  |
| Q9GZT4  | Serine racemase                                          | SRR       | 0.99    | 0.83   | 24.84 | 3.05E-05 | 0.005329  |
| P54252  | Ataxin-3                                                 | ATXN3     | 0.87    | 0.89   | 19.88 | 1.93E-05 | 0.003694  |
| P29558  | RNA-binding motif, single-stranded-interacting protein 1 | RBMS1     | 1.00    | 0.76   | 21.49 | 0.000193 | 0.013737  |
| Q01449  | Myosin regulatory light chain 2, atrial isoform          | MYL7      | 1.03    | 0.71   | 27.95 | 0.001927 | 0.040819  |
| P04062  | Glucosylceramidase                                       | GBA       | 0.69    | 0.96   | 26.67 | 8.77E-05 | 0.010235  |

|               |                                                                    |          |       |       |       |          |          |
|---------------|--------------------------------------------------------------------|----------|-------|-------|-------|----------|----------|
| Q96FV2        | Secernin-2                                                         | SCRN2    | 0.79  | 0.78  | 24.37 | 0.000151 | 0.012343 |
| Q9H008        | Phospholysine phosphohistidine inorganic pyrophosphate phosphatase | LHPP     | 0.92  | 0.65  | 23.22 | 0.002051 | 0.041287 |
| P00167        | Cytochrome b5                                                      | CYB5A    | 0.79  | 0.74  | 24.41 | 0.000157 | 0.012431 |
| Q12988        | Heat shock protein beta-3                                          | HSPB3    | 0.88  | 0.63  | 24.91 | 0.00238  | 0.044421 |
| Q96E39        | RNA binding motif protein, X-linked-like-1                         | RBMXL1   | 0.87  | 0.64  | 23.17 | 0.000735 | 0.024936 |
| P10412        | Histone H1.4                                                       | HIST1H1E | 0.98  | 0.50  | 27.81 | 0.001939 | 0.040819 |
| Q9HA64        | Ketosamine-3-kinase                                                | FN3KRP   | 0.84  | 0.64  | 23.16 | 0.00023  | 0.014663 |
| Q8TE77        | Protein phosphatase Slingshot homolog 3                            | SSH3     | 0.81  | 0.67  | 20.37 | 3.00E-05 | 0.005329 |
| Q05084        | Islet cell autoantigen 1                                           | ICA1     | 0.66  | 0.80  | 21.97 | 0.00014  | 0.012009 |
| Q03013        | Glutathione S-transferase Mu 4                                     | GSTM4    | 0.58  | 0.88  | 25.07 | 0.000715 | 0.024806 |
| P48426        | Phosphatidylinositol 5-phosphate 4-kinase type-2 alpha             | PIP4K2A  | 0.78  | 0.64  | 23.31 | 4.79E-05 | 0.006934 |
| P63208        | S-phase kinase-associated protein 1                                | SKP1     | 0.66  | 0.73  | 22.41 | 0.000235 | 0.014746 |
| P54803        | Galactocerebrosidase                                               | GALC     | 0.77  | 0.62  | 24.16 | 0.000121 | 0.011511 |
| Q9HBK9        | Arsenite methyltransferase                                         | AS3MT    | 0.65  | 0.73  | 24.81 | 2.48E-06 | 0.001471 |
| Q9Y6K1        | DNA (cytosine-5)-methyltransferase 3A                              | DNMT3A   | 0.65  | 0.51  | 23.83 | 0.000525 | 0.021418 |
| Q7Z7K0        | COX assembly mitochondrial protein homolog                         | CMC1     | 0.57  | 0.57  | 22.56 | 0.002471 | 0.044918 |
| P00568        | Adenylate kinase isoenzyme 1                                       | AK1      | 0.51  | 0.60  | 28.90 | 0.000445 | 0.020309 |
| Q16082        | Heat shock protein beta-2                                          | HSPB2    | 0.52  | 0.53  | 26.85 | 0.000173 | 0.012774 |
| Q9BXW7        | Cat eye syndrome critical region protein 5                         | CECR5    | -0.54 | -0.50 | 27.00 | 0.001837 | 0.040402 |
| Q14249        | Endonuclease G, mitochondrial                                      | ENDOG    | -0.72 | -0.51 | 24.95 | 0.000108 | 0.010898 |
| Q12965        | Unconventional myosin-1e                                           | MYO1E    | -0.54 | -0.71 | 22.16 | 5.72E-05 | 0.007746 |
| Q99424        | Peroxisomal acyl-coenzyme A oxidase 2                              | ACOX2    | -0.69 | -0.64 | 22.05 | 0.000266 | 0.015963 |
| Q86VU5        | Catechol O-methyltransferase domain-containing protein 1           | COMTD1   | -0.58 | -0.85 | 22.47 | 9.51E-05 | 0.010575 |
| Q8WWV3        | Reticulon-4-interacting protein 1, mitochondrial                   | RTN4IP1  | -0.61 | -0.87 | 24.57 | 3.15E-06 | 0.001471 |
| Q969Q1        | E3 ubiquitin-protein ligase TRIM63                                 | TRIM63   | -0.52 | -1.01 | 22.53 | 0.000344 | 0.017859 |
| <b>Q96GX9</b> | Methylthioribulose-1-phosphate dehydratase                         | APIP     | -0.82 | -0.73 | 23.54 | 0.000461 | 0.020309 |
| <b>Q96GK7</b> | Fumarylacetoacetate hydrolase domain-containing protein 2A         | FAHD2A   | -0.73 | -0.82 | 26.08 | 6.23E-07 | 0.000872 |
| <b>P26006</b> | Integrin alpha-3                                                   | ITGA3    | -0.69 | -1.17 | 24.53 | 0.000469 | 0.020309 |
| <b>P30837</b> | Aldehyde dehydrogenase X, mitochondrial                            | ALDH1B1  | -1.34 | -1.03 | 26.61 | 6.70E-06 | 0.002345 |
| <b>Q9Y2P4</b> | Long-chain fatty acid transport protein 6                          | SLC27A6  | -1.44 | -1.17 | 26.53 | 0.001958 | 0.040819 |
| <b>Q9UDR5</b> | Alpha-amino adipic semialdehyde synthase, mitochondrial            | AASS     | -1.64 | -1.09 | 25.38 | 0.00017  | 0.012774 |
| <b>Q9HB40</b> | Retinoid-inducible serine carboxypeptidase                         | SCPEP1   | -1.95 | -1.16 | 21.23 | 0.000731 | 0.024936 |
| <b>Q9BQT8</b> | Mitochondrial 2-oxodicarboxylate carrier                           | SLC25A21 | -1.59 | -1.76 | 20.43 | 0.000468 | 0.020309 |
| <b>P35556</b> | Fibrillin-2                                                        | FBN2     | -1.88 | -1.61 | 25.84 | 0.000866 | 0.026645 |
| <b>P78357</b> | Contactin-associated protein 1                                     | CNTNAP1  | -2.41 | -1.35 | 24.00 | 0.000744 | 0.024993 |
| <b>P06280</b> | Alpha-galactosidase A                                              | GLA      | -2.13 | -2.59 | 19.60 | 0.000324 | 0.017347 |
| <b>P23141</b> | Liver carboxylesterase 1                                           | CES1     | -3.68 | -3.27 | 20.87 | 2.70E-06 | 0.001471 |

**Table S5.**

| <b>GO biological process complete</b>           | <b>Homo sapiens - REFLIST (21042)</b> | <b>Fabry_set (72)</b> | <b>Fabry_set (expected)</b> | <b>Fabry_set (over/under)</b> | <b>Fabry_set (fold Enrichment)</b> | <b>Fabry_set (P-value)</b> |
|-------------------------------------------------|---------------------------------------|-----------------------|-----------------------------|-------------------------------|------------------------------------|----------------------------|
| glycosylceramide catabolic process (GO:0046477) | 6                                     | 3                     | 0.02                        | +                             | > 100                              | 1.18E-02                   |
| metabolic process (GO:0008152)                  | 9949                                  | 54                    | 34.04                       | +                             | 1.59                               | 1.35E-02                   |
| Unclassified (UNCLASSIFIED)                     | 3561                                  | 2                     | 12.18                       | -                             | < 0.2                              | 0.00E+00                   |

**Table S6.**

| <b>GO cellular component complete</b> | <b>Homo sapiens - REFLIST (21042)</b> | <b>Fabry_set (72)</b> | <b>Fabry_set (expected)</b> | <b>Fabry_set (over/under)</b> | <b>Fabry_set (fold Enrichment)</b> | <b>Fabry_set (P-value)</b> |
|---------------------------------------|---------------------------------------|-----------------------|-----------------------------|-------------------------------|------------------------------------|----------------------------|
| lysosomal lumen (GO:0043202)          | 93                                    | 5                     | 0.32                        | +                             | 15.71                              | 2.48E-02                   |
| mitochondrion (GO:0005739)            | 1731                                  | 19                    | 5.92                        | +                             | 3.21                               | 5.35E-03                   |
| cytoplasm (GO:0005737)                | 11364                                 | 57                    | 38.88                       | +                             | 1.47                               | 1.08E-02                   |
| intracellular part (GO:0044424)       | 14239                                 | 64                    | 48.72                       | +                             | 1.31                               | 3.57E-02                   |
| Unclassified (UNCLASSIFIED)           | 2449                                  | 3                     | 8.38                        | -                             | 0.36                               | 0.00E+00                   |

Table S7.

| UniProt       | Protein name                                                        | Gene name | Log2 FC |        | AvExp | p_value  | adj.P.Val |
|---------------|---------------------------------------------------------------------|-----------|---------|--------|-------|----------|-----------|
|               |                                                                     |           | Fabry1  | Fabry2 |       |          |           |
| <b>Q9UBX1</b> | Cathepsin F                                                         | CTSF      | 5.08    | 4.79   | 25.06 | 5.29E-07 | 0.000436  |
| <b>O14558</b> | Heat shock protein beta-6                                           | HSPB6     | 4.81    | 4.16   | 21.48 | 7.44E-07 | 0.000436  |
| <b>P54652</b> | Heat shock-related 70 kDa protein 2                                 | HSPA2     | 5.11    | 3.17   | 21.57 | 1.37E-06 | 0.000483  |
| <b>P39059</b> | Collagen alpha-1(XV) chain                                          | COL15A1   | 5.98    | 1.47   | 22.52 | 0.001189 | 0.043607  |
| <b>P20396</b> | Pro-thyrotropin-releasing hormone                                   | TRH       | 3.07    | 2.96   | 28.36 | 1.48E-05 | 0.004347  |
| <b>P20849</b> | Collagen alpha-1(IX) chain                                          | COL9A1    | 3.65    | 2.25   | 25.93 | 2.51E-05 | 0.006315  |
| <b>O00585</b> | C-C motif chemokine 21                                              | CCL21     | 4.32    | 1.37   | 23.98 | 0.000866 | 0.033867  |
| <b>P19835</b> | Bile salt-activated lipase                                          | CEL       | 1.14    | 3.12   | 29.08 | 0.000226 | 0.018114  |
| <b>Q8N436</b> | Inactive carboxypeptidase-like protein X2                           | CPXM2     | 2.80    | 1.39   | 26.21 | 0.000931 | 0.035611  |
| <b>Q8TB73</b> | Protein NDNF                                                        | NDNF      | 2.92    | 1.04   | 26.90 | 0.000128 | 0.017251  |
| <b>Q93077</b> | Histone H2A type 1-C                                                | HIST1H2AC | 2.33    | 1.46   | 22.96 | 0.000563 | 0.029984  |
| <b>P01160</b> | Natriuretic peptides A                                              | NPPA      | 2.09    | 0.98   | 30.49 | 0.000167 | 0.017251  |
| <b>P11277</b> | Spectrin beta chain, erythrocytic                                   | SPTB      | 1.19    | 1.70   | 24.13 | 0.000487 | 0.028591  |
| <b>P10916</b> | Myosin regulatory light chain 2, ventricular/cardiac muscle isoform | MYL2      | 0.97    | 1.38   | 28.25 | 0.000206 | 0.017892  |
| <b>Q9NZN3</b> | EH domain-containing protein 3                                      | EHD3      | 0.75    | 1.40   | 23.77 | 0.000267 | 0.01947   |
| <b>P12829</b> | Myosin light chain 4                                                | MYL4      | 0.97    | 1.13   | 29.87 | 0.000158 | 0.017251  |
| <b>Q13162</b> | Peroxiredoxin-4                                                     | PRDX4     | 1.16    | 0.83   | 23.27 | 1.32E-06 | 0.000483  |
| <b>Q9H3G5</b> | Probable serine carboxypeptidase CPVL                               | CPVL      | 0.66    | 1.31   | 27.91 | 0.000574 | 0.029984  |
| <b>P14543</b> | Nidogen-1                                                           | NID1      | 1.11    | 0.57   | 30.64 | 0.000175 | 0.017251  |
| <b>P12883</b> | Myosin-7                                                            | MYH7      | 0.70    | 0.92   | 30.83 | 0.001367 | 0.047176  |
| <b>P60891</b> | Ribose-phosphate pyrophosphokinase 1                                | PRPS1     | -0.78   | -0.62  | 23.82 | 0.001496 | 0.049663  |
| <b>Q16643</b> | Drebrin                                                             | DBN1      | -0.53   | -0.95  | 24.70 | 0.001313 | 0.046801  |
| <b>P04899</b> | Guanine nucleotide-binding protein G(i) subunit alpha-2             | GNAI2     | -0.63   | -0.86  | 23.88 | 4.26E-05 | 0.009374  |
| <b>P31949</b> | Protein S100-A11                                                    | S100A11   | -0.87   | -0.94  | 27.48 | 0.000772 | 0.031604  |
| <b>P53396</b> | ATP-citrate synthase                                                | ACLY      | -0.75   | -1.10  | 26.19 | 0.000211 | 0.017892  |
| <b>P13797</b> | Plastin-3                                                           | PLS3      | -0.97   | -1.24  | 27.69 | 0.000975 | 0.036496  |
| <b>P11413</b> | Glucose-6-phosphate 1-dehydrogenase                                 | G6PD      | -1.59   | -1.60  | 25.12 | 0.000286 | 0.01947   |
| <b>Q13219</b> | Pappalysin-1                                                        | PAPPA     | -1.33   | -1.86  | 27.65 | 0.000417 | 0.025335  |
| <b>P21589</b> | 5-nucleotidase                                                      | NT5E      | -3.50   | -1.88  | 21.19 | 0.000687 | 0.031     |
| <b>Q8IWU6</b> | Extracellular sulfatase Sulf-1                                      | SULF1     | -3.00   | -2.44  | 22.75 | 0.000715 | 0.031478  |
| <b>Q9UHG2</b> | ProSAAS                                                             | PCSK1N    | -1.91   | -3.58  | 20.59 | 0.000176 | 0.017251  |
| <b>Q96QV1</b> | Hedgehog-interacting protein                                        | HHIP      | -2.47   | -3.05  | 22.14 | 0.000684 | 0.031     |
| <b>Q8N6Y2</b> | Leucine-rich repeat-containing protein 17                           | LRRC17    | -2.45   | -4.07  | 22.08 | 0.000283 | 0.01947   |
| <b>P06280</b> | Alpha-galactosidase A                                               | GLA       | -4.52   | -4.27  | 20.51 | 5.39E-09 | 9.48E-06  |

**Table S1. Action potential parameters and sodium current of single spontaneously active cardiomyocytes.**

Data are mean  $\pm$  SEM; n = number of cells; MDP = maximal diastolic potential;  $dV/dt_{max}$  = maximal upstroke velocity; APA = action potential amplitude;  $APD_{90}$  = action potential duration at 90% repolarization;  $I_{Na}$  = peak sodium current normalized by capacitance. \*  $p < 0.05$  unpaired t-test.

**Table S2. Calcium transient parameters and response to caffeine.** Data are mean  $\pm$  SEM; n = number of experimental wells measured.

**Table S3. Complete cardiomyocyte proteome and secretome data in excel format.** Tab 1 ('Exp1\_proteome') shows data from the first cell proteomics experiment and tab 2 ('Exp2\_proteome') shows data from the second experiment. Tab 3 ('Exp1\_secretome') shows data from the first secretome experiment, tab 4 ('Exp2\_secretome') shows data from the second secretome experiment and tab 5 ('Exp3\_secretome') shows data from the third secretome experiment. Protein levels are shown as log<sub>2</sub> values. AvExp = the mean expression across all samples in the run. For sample names, con = control lines, and fab = Fabry lines, and the number before the underscore indicates the cell line and the number after indicates the biological replicate.

**Table S4. Differentially expressed proteins from complete cardiomyocyte proteome data identified using a filtering approach.** Log<sub>2</sub>FC = log<sub>2</sub> fold-change of Fabry samples (mean of 5 biological replicates for each line) compared to controls; AvExp = average expression across all samples as log<sub>2</sub> value; t = t statistic; adj.P.Val = p value with Benjamini-Hochberg adjustment.

**Table S5. Gene ontology enrichment analysis 2: cellular component overrepresentation test results.** The 72 differentially expressed proteins from **Table S4** were analysed using PANTHER (Mi et al., 2017) to test for cellular component enrichment against the whole genome.

**Table S6. Gene ontology (GO) enrichment analysis 1: biological process overrepresentation test results.** The 72 differentially expressed proteins from **Table S4** were analysed using PANTHER (Mi et al., 2017) to test for process enrichment against the whole genome.

**Table S7. Differentially expressed proteins from complete cardiomyocyte secretome data identified using a filtering approach.** Log<sub>2</sub>FC = log<sub>2</sub> fold-change of Fabry samples compared to controls (mean of 7 biological replicates for each line); AvExp = average expression across all samples as log<sub>2</sub> value; t = t statistic; adj.P.Val = p value with Benjamini-Hochberg adjustment.

## Extended Experimental Procedures

### hPSC culture and cardiac differentiation

The derivation of iPSC lines from two male Fabry disease patients carrying non-sense mutations in *GLA* was previously described (Itier et al., 2014). The patient fibroblasts were obtained from the Coriell Institute for Medical Research. In this article, clone GM00107 (c.485G>A; W162X) is referred to as Fabry 1 and clone GM00881 (c.658C>T; R220X) as Fabry 2. Four healthy male control iPSC lines were also derived internally from skin fibroblasts using the same protocol. MAN13 hESCs were kindly provided by the Kimber lab (Ye et al., 2017). MAN13 hESCs are a UK Stem Cell Bank registered line and this study was performed in full compliance with the laws, regulations and procedures that govern hESC use in the UK. The study conducted is in full compliance with Sanofi guidelines on the use of hESCs. hPSC lines were maintained in mTeSR medium (Stem Cell Technologies), on Matrigel (Corning) and passaged weekly using ReLeSR (Stem Cell Technologies). For cardiac differentiation cultures were expanded for 6 days to near confluence and then treated as follows: 10 ng/ml BMP4 + 4  $\mu$ M CHIR991021 (Miltenyi Biotec) for 48 hours and then 5  $\mu$ M Wnt C-59 (Selleckchem) for 48 hours, in RPMI 1640 medium containing 213  $\mu$ g/ml L-ascorbic acid 2-phosphate, 500  $\mu$ g/ml recombinant human albumin (A9731 Sigma-Aldrich), 100 pg/ml bFGF (Miltenyi Biotec) + 1:100 000 ITS-X (Thermo Fisher), or in RPMI 1640 + insulin-free B27. Cells were then maintained in RPMI + bFGF and ITS-X until day 11 of differentiation when they were dissociated with TrypLE Select (Thermo Fisher) and transferred to suspension in ultra-low attachment plates (Corning, #3471) for 3 days. For suspension culture and plating, cells were maintained in cardiomyocyte medium (CM): DMEM/F12 + 0.25% Bovine Serum Albumin + 1 mM Creatine, 5 mM Taurine, 0.5 mM L-carnitine, 50  $\mu$ g/ml  $\alpha$ -MTG, 50  $\mu$ g/ml AA-2P, 1x Trace Elements A, B and C (Corning), 1x Chemically Defined Lipids (Thermo Fisher), 1x Glutamax, 0.5x pen/strep and 1  $\mu$ M Thiazovivin (Stemgent), plus the addition of 1% FCS. On day 14 of differentiation the aggregated cardiomyocytes were purified using a MACS column based PSC-Derived Cardiomyocyte Isolation Kit (Miltenyi, #130-110-188) and replated on Matrigel-coated plastic. After two days the medium was changed to a maturation promoting formula: CM (as above) + 5 nM T3 + 5 nM dexamethasone + 20  $\mu$ M palmitic acid (conjugated to fatty-acid free BSA) + 0.25% FBS, as supported by our previous work (Birket et al., 2015). Unless otherwise stated, reagents were from Sigma-Aldrich. Cardiomyocytes were analysed between day 35 and day 60 of differentiation and later dissociations were performed with TrypLE Select (Thermo Fisher).

### CRISPR-Cas9 gene editing

We initially attempted to directly convert the *GLA* c.658C>T using a sgRNA targeting this site and supplying a ssDNA donor harbouring the correction flanked by 60nt homology. However, despite high incidence of NHEJ no sequence correction was detected (measured by TIDE/TIDER analysis (Brinkman et al., 2014); data not shown). We thus adopted a selection based CRISPR strategy. First, ribonucleoprotein (RNP) complexes of

CRISPR-Cas9 targeting sequences flanking exon 5, along with a targeting vector, were delivered into Fabry2 iPSCs using an Amaxa 2b nucleofector (program B-16). The crRNA sequences were as follows: 5'-ACAGATTGAACGTCTCCATA-3' and 5'-TATGTGAGAGTACTTAGAGC-3'. RNP complexes were made by complexing 120 pmol cr:tracrRNA duplex (IDT) with 67 pmol S.p. Cas9 Nuclease V3 (IDT). 120 pmol carrier DNA was included as an electroporation enhancer (IDT cat # 1075915).

The targeting vector incorporated a 5' homology arm of 801 bp and a 3' homology arm of 750 bp flanking corrected exon 5 (pUC57-5'H-loxP-SA-2A-Puro-loxP-correctExon-3'H). 48h after electroporation, iPSCs were selected with 1 µg/ml puromycin for 48h, then electroporated with 1 µg of Cre expression vector (pCAG-Cre-IRES2-GFP; Addgene plasmid #26646), FACS sorted for GFP expression and directly cloned. Expanded clones were screened by PCR, taking advantage of a unique intronic primer site introduced 3' of exon 5, and sequenced. All analyzed clones were correctly targeted.

To generate *GLA* knockout hPSC lines, MAN13 hESCs and con 3 iPSCs were electroporated as above using a crRNA sequence targeting exon 1 (5'-TTGGCAAGGACGCCTACCAT-3'), which was found to induce in-del mutations with 60-80% efficiency. Cells were cloned by serial dilution and screened by sequencing. Clones with frameshift mutations and undetectable  $\alpha$ -gal A expression by Western blot were used for subsequent experiments: MAN13 hESCs (*GLA* c.121\_125delTACCA) and con3\_iPSCs (*GLA* c. 123delC).

### **Lentiviral transduction**

*SCARB2* was overexpressed by lentivirus produced using a pLenti CMV/TO Puro DEST vector (Addgene plasmid #17452). The empty vector, or vector with a GFP insert, were used as controls. Lentiviral particles were concentrated using ultracentrifugation and used to transduce cardiomyocytes at the time of their purification on day 14. Transduced cells were selected with 0.75 µg/ml puromycin and then cultured as normal. Conditioned medium was collected 5-8 days after transduction of cardiomyocytes or 293FT cells.

### **Gb3 quantification**

Measurements were performed using mass spectrometry as previously described (Itier et al., 2014).

### **Flow cytometry**

Differentiated cultures were dissociated using TrypLE Select and labelled with a primary biotin-conjugated anti-CD172a (SIRPA) antibody (Miltenyi-biotec; clone REA144) and then an anti-biotin-VioBright FITC secondary antibody (Miltenyi-biotec; #130-104-514). For TMRM measurements, cells were equilibrated with 2.5nM TMRM overnight before dissociation and measurement. Measurements were performed on a Miltenyi VYB.

### **Immunocytochemistry and cell size determination**

Dissociated iPSC-CMs differentiated for ~40 days were seeded at single cell density on glass coverslips micropatterned with 20 µm wide gelatin lines as previously described (Birket et al., 2015). 4 days later cells

were fixed with 4% paraformaldehyde for 20 mins, permeablized with 0.1% Triton-X, blocked with 1% BSA + 0.4% horse serum for 1 hour, and then labelled overnight at 4°C with primary antibody. Antibodies were as follows: anti- $\alpha$ -actinin (Sigma; A7811), anti-MLC-2V (Proteintech; 10906-1-AP) and anti-myomesin-3 (Proteintech; 17692-1-AP). Imaging was performed with a 60x objective. Individual separated cardiomyocytes were identified based on  $\alpha$ -actinin labelling and then MLC-2V or myomesin-3 labelling was also imaged and recorded. Cell area was calculated using a thresholding mask based on  $\alpha$ -actinin labelling.

### **Electrophysiology**

Dissociated iPSC-CMs differentiated for 30 days were seeded at single cell density on glass coverslips (Corning, #354086) coated with fibronectin (Sigma, #F0895) and used for measurement 3-8 days later. Patch-clamp experiments were performed at 37°C and cells were continuously perfused with an external solution containing (in mM): 140 NaCl, 5 KCl, 1 CaCl<sub>2</sub>, 1 MgCl<sub>2</sub>, 10 glucose, 10 HEPES. pH was set to 7.4 with NaOH 1M. The patch pipettes were pulled from thick-walled borosilicate glass capillaries (Harvard Apparatus, Edenbridge, UK) on a DMZ-universal electrode puller (Zeitz-Instruments GmbH). Electrode impedance was 4–6 MOhms when filled with an internal solution containing (in mM): 110 Kaspate, 20 KCl, 1 MgCl<sub>2</sub>, 0.1 Na-GTP, 5 Mg-ATP, 5 phosphocreatine, 1 EGTA, 10 HEPES. pH was adjusted to 7.2 with KOH 1 M. Data were all corrected for liquid junction potential (15.4 mV). Ionic currents and action potentials were recorded on isolated spontaneously beating CMs in the whole-cell configuration of the patch-clamp technique using digidata 1550/Multiclamp 700B (Molecular Devices, Sunnyvale, CA, USA) for data amplification and acquisition. Data were acquired at 10 KHz and low-pass filtered at 5 kHz using Clampex software (pClamp 10.5, Molecular Devices). The same following protocol was applied to all CMs: upon seal formation and following patch membrane break, a 50 ms test pulse from a holding potential of -80 to 0 mV was applied in voltage-clamp mode to record Na<sup>+</sup>-current maximal amplitude. The patch was then switched to current-clamp mode and spontaneous action potentials (APs) were recorded for 1 min at resting potential without injecting any current.

For currents and AP analysis, Clampfit software was used (pClamp 10.5, Molecular Devices). Na<sup>+</sup>-current density was obtained by normalizing Na<sup>+</sup>-current maximal amplitude to the cell capacitance and expressed in pA/pF. For AP analysis, common electrophysiological characteristics such as action potential duration at 90% of repolarization (APD<sub>90</sub>), action potential amplitude and maximum diastolic potential (MDP) were calculated.

### **Calcium imaging**

Dissociated iPSC-CMs differentiated for 30 days were seeded at a density of  $5 \times 10^4$  cells/well in black walled clear bottom 96-well plates (Costar, #655946) coated with Matrigel and used for measurement 3-8 days later. The Cal-520 calcium assay was performed as outlined in the product information sheet provided with the Hamamatsu FDSS  $\mu$ Cell (Hamamatsu Photonics, Hamamatsu, Japan). Briefly, stock solution of Cal-520 dye was



prepared at 5 mM in DMSO. Assay buffer was made from Hank's Balanced Saline Solution (HBSS) buffered with 20 mM HEPES. Powerload™ concentrate was used to enhance the dye solubility. Cells were incubated in 5  $\mu$ M of Cal-520 dye for 60 minutes to 90 minutes at 37°C, washed twice with warm dye-free assay buffer and then imaged in 80  $\mu$ L per well of warm assay buffer. Fluorescence measurements were performed into FDSS  $\mu$ Cell at 37°C. The microplate was illuminated at 470 nm and fluorescence was measured at 540 nm using the high-speed acquisition mode (100 Hz). The caffeine response was assessed by injecting 10  $\mu$ L of caffeine at 50 mM using the 96-well dispenser head, resulting in a final concentration of 10 mM. Data acquisition was performed using FDSSv3 software and analyzed using the WaveForm Analysis, software (Hamamatsu Photonics, Hamamatsu, Japan). Fluorescence measurements are represented as relative fluorescence unit (RFU). For each experiment, spontaneous calcium transients were analyzed over 2 minutes. Frequency, basal fluorescence (F), amplitude ( $\Delta F/F$ ), peak width at 90% of recovery (PWD-90%), corrected peak width (corrected PWD-90%, calculated by Fridericia's formula and rising slope (30%-70%) were measured (exemplified in **Fig. S1**).

### **Proteome sample preparation**

Dissociated iPSC-CMs differentiated for 35 days were pelleted and lysed in a buffer of 1% SDS, 0.25  $\mu$ M/ml benzonase and protease inhibitors for 30 min at 37°C. Protein concentration was measured with BCA (Thermo BCA Protein Assay Kit). Extracted protein was then loaded on a 4-12% SDS-page gel (approx. 12  $\mu$ g protein per lane) for approx. 3 min. Reduction/alkylation/digestion steps were then performed in gel. Gel slices were subjected to two washing steps with a mixture of 50 mM ammonium carbonate buffer/ACN (50/50), then to reduction by 30 min incubation at 56°C with 20 mM DTT, followed by two more washing steps. Proteins were subjected to alkylation for 30 min in presence of 40 mM iodoacetamide, followed by two washing steps. After the addition of 0.01  $\mu$ g/ $\mu$ L trypsin, gels slices were incubated overnight at 37°C. The peptide mixture solution was then acidified by addition of formic acid and filtered using a 0.2  $\mu$ m membrane before injection.

### **Secretome sample preparation**

Cardiomyocytes were washed 3 times and then incubated in FCS- and BSA-free medium for conditioning and collection. The medium composition was: phenol red-free DMEM/F12 + 1:100 000 ITS-X + 1 mM Creatine, 5 mM Taurine, 0.5 mM L-carnitine, 50  $\mu$ g/ml  $\alpha$ -MTG, 50  $\mu$ g/ml AA-2P, 1x Trace Elements A-B-C, 1x Chemically Defined Lipids, 1x Glutamax, 0.5x pen/strep. Conditioned medium was collected daily for up to 5 days, centrifuged at 1000g for 10 min to remove debris and frozen at -80°C.

Enrichment of soluble proteins was performed using NanoZeolites obtained from NanoScape AG; Germany. Adsorption of proteins on the surface was carried out by incubating the conditioned medium with NanoZeolite beads for 90 min at 4°C. After centrifugation at 16000g for 20 min, 4°C, pellets were washed twice with 100 mM ammonium carbonate buffer. Proteins bound to the NanoZeolite beads were reduced with 10 mM DTT,

0.05% AALS in 50 mM ammonium carbonate buffer at 56°C for 30 min and subsequently alkylated by addition of 20 mM iodoacetamide and 30 min incubation step at room temperature. Over-alkylation was limited by adding 20 mM DTT. Trypsin was then added at 0.01 µg/µL, followed by an overnight incubation at 37°C. After digestion AALS was precipitated in presence of 1% TFA and filtration performed at 0.2 µm.

For Western blotting, protein from 3ml of conditioned medium was precipitated using ice cold acetone (1:4), incubated for 1 h, 4°C, pelleted at 3500G for 30 min, 4°C, resuspended in loading buffer, heated at 95°C for 5 min and centrifuged again to remove debris.

### **Liquid chromatography-mass spectrometry**

Peptides were separated on a nanoacquity nanoLC (Waters) coupled to an Orbitrap Fusion mass spectrometer (Thermo) via a nanoelectrospray source. Peptides were loaded on a trap column (Symetry C18 100A 180 µm x 2 cm 5 µm, Waters) and separated on a BEH C18 column (Peptide BEH-C18 130A, 1.7 µm, 75 µm x 250 mm column temperature: 40°C, Waters) by a 140 min gradient from 5% to 85% ACN (+0.1% formic acid) at a flow rate 0.3 µl/min. The Fusion was operated in a data dependent mode with a survey scan range of 325-1200 m/z and a resolution of 120 000 at m/z 200. Selection of precursors was performed using the top speed mode and subjected to high energy collision in the HCD cell at a normalized collision energy of 23. Fragmentation spectra were acquired in the trap in the rapid mode scan rate. Dynamic exclusion of sequenced peptides was set to 50 s to reduce repeated peptide sequencing. Threshold for ion injection time and ion target were set to 50 ms and 2E5 for the survey scans and 35 ms and 1E4 for the MS/MS scans respectively.

### **Label free quantification**

MaxQuant software (version 1.5.3.8) was used to analyse MS raw files. MS/MS spectra were searched against the human Uniprot FASTA database (version February 2017). Cysteine carbamidomethylation was applied as fixed and N-terminal acetylation, pyroQ and methionine oxidations as variable modifications. Enzyme specificity was set to Trypsin/P with a maximum of 3 missed cleavages. A false discovery rate (FDR) of 1% was applied at the peptide and protein level. Normalization of samples intensities was performed via Maxquant label free quantification algorithm (MaxLFQ).

### **Proteomics data analysis**

Data analysis and visualization was performed using the Perseus software (version 1.5.5.3) and then using R/Bioconductor tools. Proteins identified with ≥1 unique peptide and positive gene identification were used for quantification. Logarithmic transformation was applied, and the median of injections was calculated. Missing values were imputed with the mean of the minima of all data. Protein identifications were required to have more than 50% valid values in at least one group of biological replicates.

Heatmaps and hierarchical clustering plots were generated using the 'pheatmap' package. Limma analysis was performed contrasting control and Fabry protein sets with >1 unique peptide with the following arguments for the topTable() function: adjust="BH", lfc = 0.585 and p.value = 0.1 (Ritchie et al., 2015). Outputs were also visualised using the volcanoPlot() function. A filtering approach to identify differentially abundant proteins was also applied by first calculating the difference in expression of each Fabry sample compared to the mean of all the control samples in that group. Proteins with  $\geq 0.5$  log<sub>2</sub> fold-change for both Fabry lines individually and an adjusted p-value <0.05 using all samples (one-sample t-test;  $\mu = 0$ ) were selected. Each sample was considered as an independent replicate. The lower p-value used for filtering was used to prioritize the candidates to a sensible number. Proteins with more than one missing value in the higher expressed group were discounted, after inspection. Classification as plasma protein and presence of signal peptide was performed using the Plasma Proteome Database (<http://www.plasmaproteomedatabase.org/>) and SignalP (<http://www.cbs.dtu.dk/services/SignalP/>) via the Human Protein Atlas (<https://www.proteinatlas.org/>). Protein-protein interaction network analysis was performed using STRING (<https://string-db.org>).

### **Western blot**

Dissociated cell pellets were lysed in RIPA buffer + protease inhibitors (Thermo Scientific; #78440) + 80U/ml DNase I (Sigma, #D4527) + 5mM EDTA, sonicated briefly and then centrifuged to remove cell debris. 10 or 30  $\mu$ g of cell lysate was heated at 95°C in loading buffer, loaded onto a 4-20% SDS-polyacrylamide gel (Biorad; #5678094) and transferred to a PVDF membrane using a Trans-Blot Turbo Transfer Pack (Biorad; #170-4157). Membranes were blocked in 5% milk in TBS-T and incubated in primary antibody overnight at 4°C. Antibodies and their dilutions were as follows: Anti-LIMP-2 (Abcam ab176317; 1:1000), anti-HSP70-2 (Abcam ab108416; 1:1000), anti-calsequestrin 2 (Proteintech 18422-1-AP; 1:1000), anti-GCase (internal; 1:500), anti-LAMP-2 (Santa-Cruz Sc-18822; 1:500), anti-GLA (Abcam ab168341; 1:1000), anti-CTSF (Abcam ab200650; 1:500), anti-collagen I (SouthernBiotech 1310-01; 1:1000), anti-collagen IV (Novocastra NCL-COLL-IV; 1:1000), anti-GAPDH (Abcam; 1:3000). HRP-conjugated secondary antibodies were as follows: anti-mouse IgG(H+L) HRP (Thermo Fisher #32230; 1:10 000) and anti-rabbit IgG(H+L) HRP (Thermo Fisher #32460; 1:10 000).

## References

Birket, M.J., Ribeiro, M.C., Kosmidis, G., Ward, D., Leitoguinho, A.R., van de Pol, V., Dambrot, C., Devalla, H.D., Davis, R.P., Mastroberardino, P.G., et al. (2015). Contractile Defect Caused by Mutation in MYBPC3 Revealed under Conditions Optimized for Human PSC-Cardiomyocyte Function. *Cell Rep.* *13*, 733.

Brinkman, E.K., Chen, T., Amendola, M., and van Steensel, B. (2014). Easy quantitative assessment of genome editing by sequence trace decomposition. *Nucleic Acids Res.* *42*, e168–e168.

Itier, J.-M., Ret, G., Viale, S., Sweet, L., Bangari, D., Caron, A., Le-Gall, F., Bénichou, B., Leonard, J., Deleuze, J.-F., et al. (2014). Effective clearance of GL-3 in a human iPSC-derived cardiomyocyte model of Fabry disease. *J. Inherit. Metab. Dis.* *37*, 1013–1022.

Mi, H., Huang, X., Muruganujan, A., Tang, H., Mills, C., Kang, D., and Thomas, P.D. (2017). PANTHER version 11: expanded annotation data from Gene Ontology and Reactome pathways, and data analysis tool enhancements. *Nucleic Acids Res.* *45*, D183–D189.

Ritchie, M.E., Phipson, B., Wu, D., Hu, Y., Law, C.W., Shi, W., and Smyth, G.K. (2015). limma powers differential expression analyses for RNA-sequencing and microarray studies. *Nucleic Acids Res.* *43*, e47.

Ye, J., Bates, N., Soteriou, D., Grady, L., Edmond, C., Ross, A., Kerby, A., Lewis, P.A., Adeniyi, T., Wright, R., et al. (2017). High quality clinical grade human embryonic stem cell lines derived from fresh discarded embryos. *Stem Cell Res. Ther.* *8*, 128.
